# Supplementary material for: Occurrence of Escherichia coli Pathotypes in Diarrheic Calves in a Low-Income Setting
Source: MDPI journal article supplement (doi:10.3390/pathogens12010042), 2022-12-27
Supplement: s1 [file s1]

**Supplementary Table S1.** The background information of the 100 diarrheic calves including the breed, feed, and housing practices in 98 farms in the Basona Werana district, Ethiopia. wks; weeks; NS: not started

| Farm Description                                                   |                          |                  |                        |       |
|--------------------------------------------------------------------|--------------------------|------------------|------------------------|-------|
| Diarrheic calf information                                         | Category                 |                  | Diarrheic calves -n(%) | Total |
| Which sex the calf is?                                             | Sex                      | Male             | 47 (47)                | 100   |
|                                                                    |                          | Female           | 53 (53)                |       |
| How old the calf is?                                               | Age (weeks)              | (0 -2] wks       | 3 (3)                  | 100   |
|                                                                    |                          | (2 – 4] wks      | 30 (30)                |       |
|                                                                    |                          | (4 – 7] wks      | 27 (27)                |       |
|                                                                    |                          | (7 – 10] wks     | 39 (39)                |       |
|                                                                    |                          |                  |                        |       |
| What is the breed of the calf?                                     | Breed                    | Indigenous-breed | 15 (15)                | 100   |
|                                                                    |                          | Cross-breed      | 85 (85)                |       |
| Did you feed colostrum for the calf?                               | Colostrum_feeding        | No               | 11 (11)                | 100   |
|                                                                    |                          | Yes              | 89 (89)                |       |
| If yes to the above question when was the first colostrum feeding? | Clostrum_feeding_time    | (0 – 6] hrs      | 43 (43)                | 100   |
|                                                                    |                          | (6 – 24] hrs     | 46 (46)                |       |
| How did you feed colostrum to the calf?                            | Colostrum_feeding_method | Suckle           | 72 (72)                | 100   |
|                                                                    |                          | Hand             | 17 (17)                |       |
| What are your supplementary feed choices?                          | Supplementary_feed       | NS               | 16 (16)                | 100   |
|                                                                    |                          | Grazing          | 27 (27)                |       |
|                                                                    |                          | Concentrates     | 9 (9)                  |       |
|                                                                    |                          | Hay              | 23 (23)                |       |
|                                                                    |                          | Combined         | 25 (25)                |       |
| Calving house                                                      | Category                 |                  | Farms n (%)            |       |
| What is the calving housing at your farm?                          | Calving_house            | Pen              | 68 (69)                | 98    |
|                                                                    |                          | Barn             | 30 (31)                |       |
| What is the nature of the floor for calving house at your farm?    | Calvin_house_floor       | Soil             | 72 (74)                | 98    |
|                                                                    |                          | Concret          | 8 (8)                  |       |
|                                                                    |                          | Stonelined       | 18 (18)                |       |
| How cleaned is the calving house?                                  | Calving_house_cleaness   | Very poor        | 17 (17)                | 98    |
|                                                                    |                          | Poor             | 61 (63)                |       |
|                                                                    |                          | Good             | 15 (15)                |       |
|                                                                    |                          | Very good        | 5 (5)                  |       |

n & %: number and percentage of diarrheic calves/farms, Wks – weeks, hrs – hours, NS – not started

**Supplementary Table S2.** Calving house hygiene assessment checklist

| No | Calving House hygiene checklist              | Yes | No | Points | Hygienic Rank |
|----|----------------------------------------------|-----|----|--------|---------------|
|    |                                              | ☒   | ☒  |        |               |
| 1. | Proper manure disposal - no manure leftovers | 1   | 0  | ≤ 1    | Very poor     |
| 2. | Properly dried – no wet                      | 1   | 0  | 2      | Poor          |
| 3. | Presence of air circulation                  | 1   | 0  | 3      | Good          |
| 4. | Absence of other nearby wastes               | 1   | 0  | 4      | Very good     |

**Supplementary Table S3.** The table shows farm descriptions by the number of animals, farm types, and subdistricts. A total of 98 farms of three types; enterprise, family, and research were sampled in 10 subdistricts in Basoga Werana district, Ethiopia. The farms were categorized into two sizes, small farm (SF), 2- 6 animals per farm, and medium farm (MF), 7- 3 animals per farm with an average and median values of 6.5 and 6 animals per farm.

|             |              | Number of animals |        |      |        | Farm size |    |       |
|-------------|--------------|-------------------|--------|------|--------|-----------|----|-------|
|             |              |                   |        |      |        | SF        | MF |       |
|             |              | 2 - 6             | 7 - 32 | Mean | Median | n         |    | Total |
| Farm type   | Entrepreneur | 0                 | 2      |      |        |           |    |       |
|             | Family       | 51                | 44     | 6.5  | 6      | 51        | 47 | 98    |
|             | Research     | 0                 | 1      |      |        |           |    |       |
| Subdistrict | Angolela     | 23                | 24     |      |        |           |    |       |
|             | Keyet        | 4                 | 1      |      |        |           |    |       |
|             | Bakelo       | 6                 | 8      |      |        |           |    |       |
|             | Chacha       | 1                 | 0      |      |        |           |    |       |
|             | Wushawushegn | 3                 | 0      | 6.5  | 6      | 51        | 47 | 98    |
|             | Sariya       | 6                 | 6      |      |        |           |    |       |
|             | Debre Birhan | 4                 | 2      |      |        |           |    |       |
|             | Abamote      | 1                 | 1      |      |        |           |    |       |
|             | Weyeniyana   | 1                 | 2      |      |        |           |    |       |
|             | Korma Gefiya | 2                 | 3      |      |        |           |    |       |

**n** - number of farms in each category, SF – small farm, MF – medium farm
